# Supplementary material for: Crystal facet evolution of spinel Co3O4nanosheets in acidic oxygen evolution catalysis
Source: Royal Society of Chemistry journal article supplement (doi:10.1039/d3cy00713h), 2023-01-01
Supplement: d3cy00713h1.pdf [file d3cy00713h1.pdf]

## Supporting information

### Crystal Facets Evolution of Spinel Co<sub>3</sub>O<sub>4</sub> Nanosheets in Acidic Oxygen

#### Evolution Catalysis

Ziyang Sheng,<sup>a</sup> Sihong Wang,<sup>a</sup> Qu Jiang,<sup>a</sup> Yuanman Ni,<sup>a</sup> Chaoran Zhang,<sup>a</sup>

Ashfaq Ahmad,<sup>a</sup> and Fang Song,<sup>a\*</sup>

<sup>a</sup>State Key Laboratory of Metal Matrix Composites, School of Materials Science and Engineering, Shanghai Jiao Tong University, Shanghai 200240, China

\* Corresponding authors: [songfang@sjtu.edu.cn](mailto:songfang@sjtu.edu.cn)

## **EXPERIMENTAL SECTION**

### **General.**

All chemicals were directly used as they were received from manufacturers. Double-sided hydrophilic carbon paper (TGP-H-060) was purchased from TORAY. Cobalt(II) nitrate hexahydrate (99%) was obtained from Aladdin. 5 wt.% Nafion solution was obtained from Alfa Aesar. Sulfuric acid (95.0-98.0%), Hydrochloric acid, acetone, and anhydrous ethanol were purchased from Sinopharm Group. Millipore-Q water (18.2 M $\Omega$ ) was used for all the measurements and synthesis.

### **Characterization**

The crystallographic information of Co<sub>3</sub>O<sub>4</sub> on carbon paper was collected by Mini Flex 600 with Cu K $\alpha$  irradiation ( $\lambda = 1.5406 \text{ \AA}$ ) at 40 kV and 40 mA in the  $2\theta$  range of 30 to 80° with a scanning rate of 10°/min. TESCAN MIRA3 field emission scanning electron microscopy (FE-SEM) and accompanying energy dispersive spectroscopy (EDS) was applied to confirm the morphology and elements of the products. Transmission electron microscopy (TEM) and high-resolution Transmission electron microscopy (HRTEM) was collected by Talos F200X G2 FETEM under an acceleration voltage of 200 kV. X-ray photoelectron spectroscopy (XPS) analysis was obtained by AXIS UltraDLD and all spectra were corrected using C 1s line at 284.6 eV. Inductively coupled plasma-mass spectrometry(ICP-MS) was used to test the metal element contained in the electrolyte by iCAP Q.

### **Synthesis of Co<sub>3</sub>O<sub>4</sub> nanosheets.**

Firstly, Hydrophilic carbon paper was cut into small pieces with designated sizes. They were dipped into an aqueous solution mixed with 20 mL acetone and 20 mL 3 M HCl for 10 min under ultrasonication conditions. The carbon papers were then washed with 20 mL deionized water and 20 mL anhydrous ethanol by ultrasonication for 10 min. Following this, the carbon papers were taken out and dried at 60 °C for use.

The cleaned carbon papers were held with a glassy carbon electrode clamp

at one end and were used as working electrodes. A three-electrode system was constructed with 50 mL 0.1M  $\text{Co}(\text{NO}_3)_2$  aqueous solution as the electrolyte,  $10 \times 10 \times 0.1$  mm platinum electrode as the counter electrode, and saturated silver chloride electrode as the reference electrode. Gamry electrochemical workstation was used for electrodeposition at -2 mA constant current for 1000s. After the electrodeposition was completed, the carbon paper was soaked and rinsed in deionized water several times and dried in a  $60^\circ\text{C}$  vacuum for 12 h. Finally, the blue-green carbon paper loaded with  $\alpha$ -cobalt hydroxide was obtained.<sup>1,2</sup>

The dried  $\alpha\text{-Co}(\text{OH})_2/\text{CP}$  was placed in the ceramic ark and heat-treated by a quartz tube furnace. In order to retain the morphology of cobalt hydroxide, the heating rate of  $1^\circ\text{C}/\text{min}$  was adopted to  $300^\circ\text{C}$ , and the temperature was cooled to a normal temperature at  $1^\circ\text{C}/\text{min}$  after holding for 2 h, and then the array of cobalt tetroxide nanosheets supported on carbon paper ( $\text{Co}_3\text{O}_4/\text{CP}$ ) was obtained.<sup>3</sup>

In order to reduce the physical peeling of the nanosheets in the agitated electrolyte,  $15\mu\text{L}$  Nafion dispersion (anhydrous ethanol, deionized water, and 5%Nafion polymer volume ratio 8:1.5:0.5) was added to both sides of the carbon paper and dried at  $60^\circ\text{C}$  for 30 min before the electrochemical test.

### **Math methods.**

Decoupling of redox peaks is achieved through Origin2023's Peak Deconvolution feature. After deducting the background current, the initial predicted positions of the three Gaussian peaks were set manually, and then the peak areas and peak positions of the three reduction peaks were obtained by automatically fitting.

### **Electrochemical measurements.**

All electrochemical characterizations were investigated on Gamry Reference600+ potentiostat in a three-electrode configuration cell using  $\text{Co}_3\text{O}_4/\text{CP}$  with a precisely controlled active area of  $1\text{ cm}^2$  as working electrode,

platinum plate ( $1 \times 1 \text{ cm}^2$ ) as the counter electrode and calibrated saturated Silver/chloride silver (Ag/AgCl) as the reference electrode at room temperature. The electrolyte was mixed with 0.5 M  $\text{H}_2\text{SO}_4$  and 0.5 M  $\text{Na}_2\text{SO}_4$  solution to ensure the cation concentration is 1 M. The potentials were referenced to the RHE ( $E_{\text{RHE}} = E_{\text{Ag/AgCl}} + 0.196 \text{ V} + 0.0592 \cdot \text{pH} \text{ V}$ ). iR compensation was realized by the CI function of the potentiostat. The voltammetry cycle curve was obtained at a sweep speed of  $5 \text{ mV s}^{-1}$ . The analysis of the reduction peak pattern is based on the reverse sweep curve of CV (See more detail in supplementary methods). Electrochemical surface area (ECSA) was obtained by linear fitting of the average charge-discharge current of the CV curve at sweep speeds of 10, 60, 110, and  $160 \text{ mV s}^{-1}$  near the open-circuit potential. Electrochemical impedance spectroscopy is obtained at a fixed potential with an amplitude of 10 mV at a frequency from 0.1 to 20kHz.

### **Computational methods.**

According to the XRD and TEM analysis,  $\text{Co}_3\text{O}_4$  ( $Fd\bar{3}m$  space group) was used as the computational model. To model the dissolution process under OER conditions, oxygen-path and metal-path containing OOH intermediates were considered in the calculations. In this work,  $\text{Co}^{2+}$  was considered as the dissolved product of  $\text{Co}_3\text{O}_4$  in acidic conditions and the energy of  $\text{Co}^{2+}$  was corrected to an electrode potential of  $-1.7 \text{ V}$  versus RHE based on the standard redox potential ( $\text{Co}^{2+} + 2\text{e}^- \leftrightarrow \text{Co}(\text{s})$ ,  $U' = -0.28 \text{ V}$ ). All calculations were carried out within the context of periodic density functional theory (DFT), as implemented in the Vienna ab initio simulation package (VASP), version 5.4.4. The core electrons were described by using the projector augmented plane-wave (PAW) pseudopotential. For each facet, we adopted a Gamma-point centered k-point mesh. The cut-off energy of the plane wave was set to 450 eV and the energy convergence criterion for the self-consistent-field (SCF) cycles was set to  $10^{-6} \text{ eV}$  per cell. The electrode potentials were corrected to the experimental current density of  $10 \text{ mA cm}^{-2}_{\text{geo}}$  at 1.623 V versus RHE for  $\text{Co}_3\text{O}_4$  in the calculation of the reaction energies.



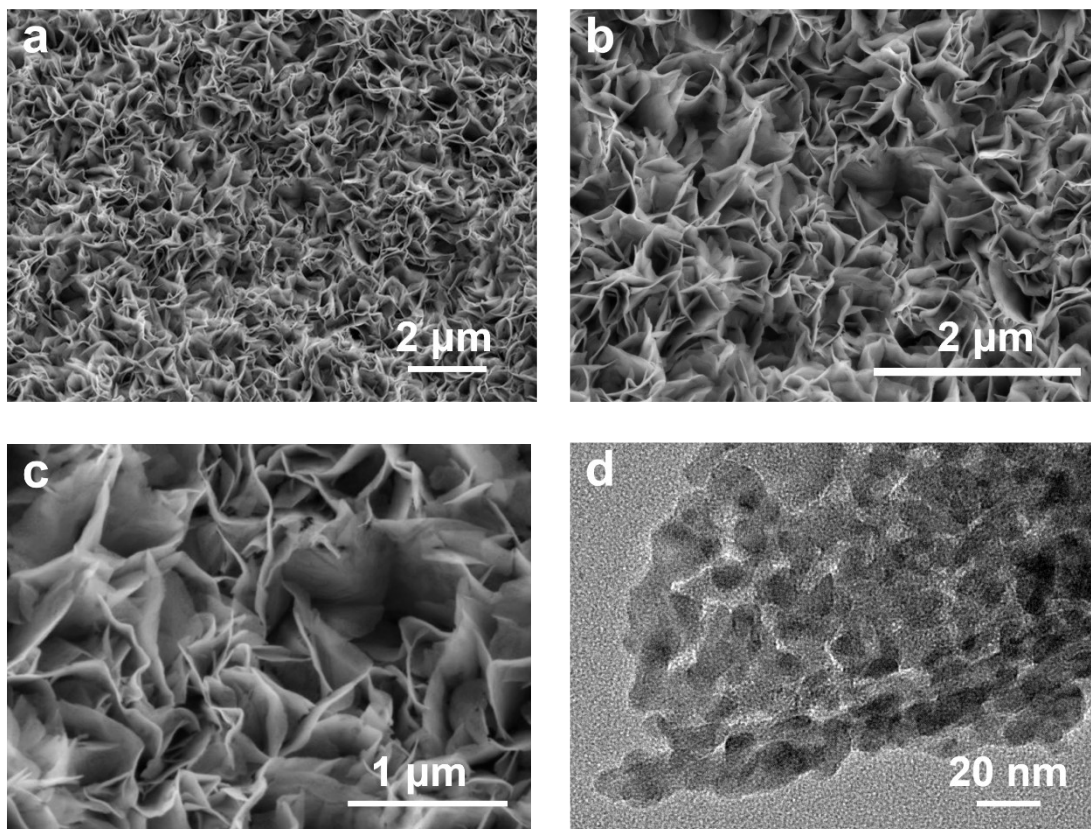

**Figure S1.**Microstructures of  $\text{Co}_3\text{O}_4$  nanosheets, **a-c)** SEM image, **d)** TEM image.

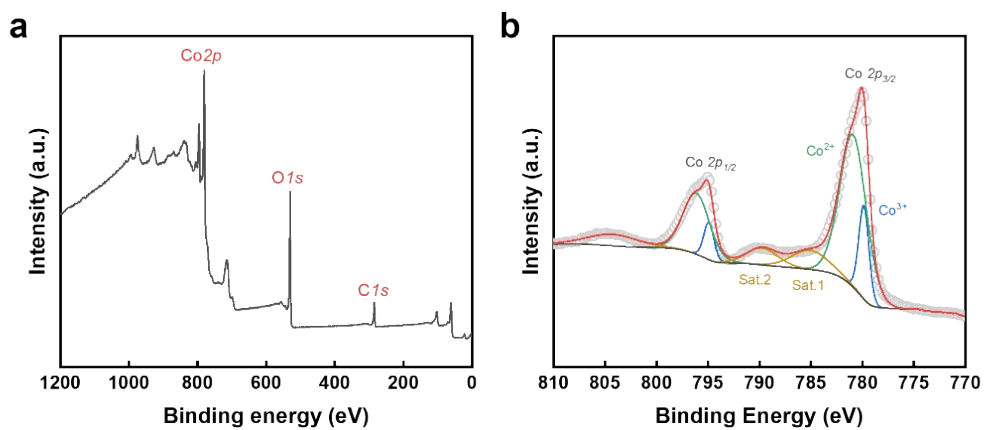

**Figure S2.** XPS of  $\text{Co}_3\text{O}_4$  before OER reaction. **a)** XPS survey spectra. **b)** High-resolution spectra of  $\text{Co}2p$ . The  $\text{Co}2p$  spectra were fitted by considering two spin-orbit doublets characteristic of  $\text{Co}^{2+}$ ,  $\text{Co}^{3+}$ , and shakeup satellites.

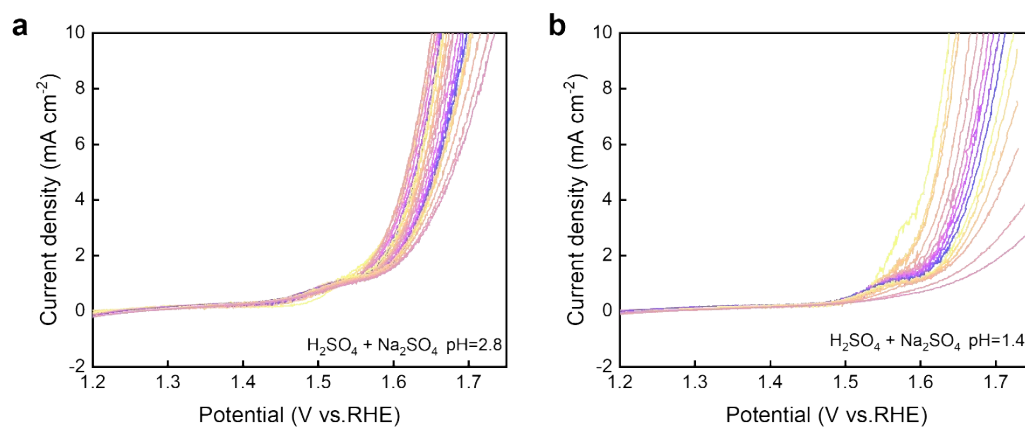

**Figure S3.** Evolution of LSV scans of Co<sub>3</sub>O<sub>4</sub> nanosheets at different times in electrolytes of **a)** pH=2.8 and **b)** pH=1.4. There is a one-hour interval between each curve. Co<sub>3</sub>O<sub>4</sub> had a more stable oxidation peak (~1.52 V vs. RHE) in the electrolyte of pH=2.8 over that of pH=1.4.



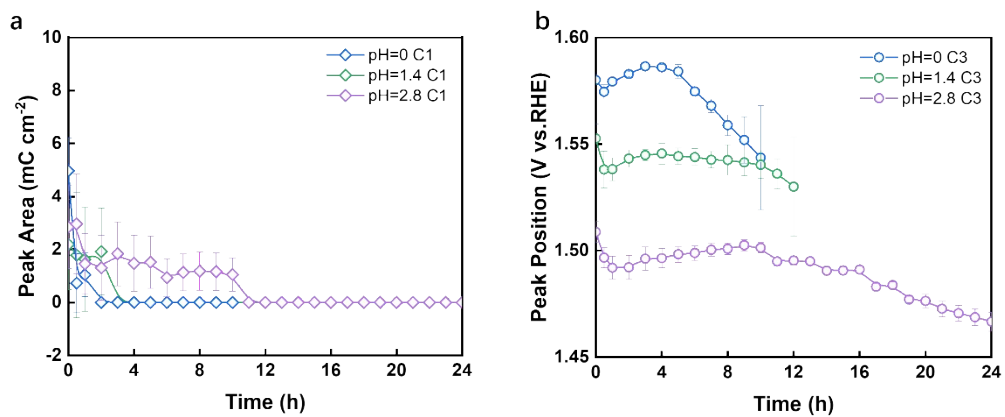

**Figure S4.** Peak areas of **a) C1** and **b) C3** plotting against the electrolysis time at pH= 0, 1.4, and 2.8. The fitting parameters are listed in Table S3-S5.

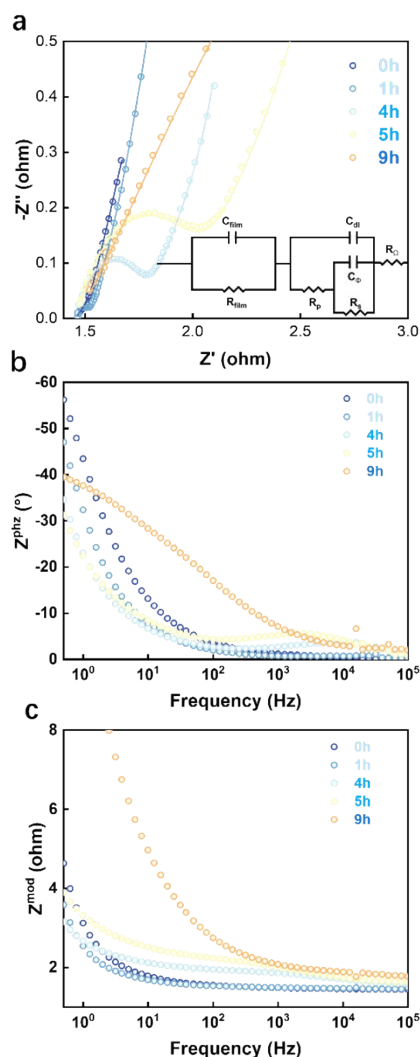

**Figure S5.** EIS of  $\text{Co}_3\text{O}_4$  catalysts at different times. **a)** Nyquist plots. **b, c)** Bode plots. The inset in a) shows the circuit model used for fitting. We used a “thick-film interfacial adsorption model” to quantify the adsorption/desorption behavior at the interface of thick-film catalysts.<sup>4,5</sup> The fitting parameters are listed in Table S4.  $R_\Omega$ ,  $C_{dl}$ ,  $R_{film}$ , and  $C_{film}$  correspond to the solution resistance, double-layer capacitance, thick-film resistance, and capacitance, respectively.  $R_s$  is a charge transfer resistance controlled by the adsorption/desorption process of the intermediate.  $R_p$  refers to a resistance related to charging transfer.  $C_\phi$  is the charge relaxation of the adsorbed intermediates.

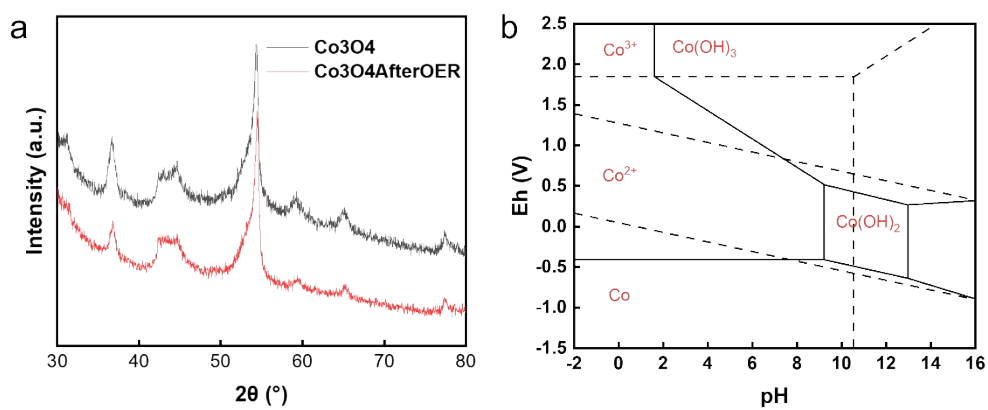

**Figure S6. a)** XRD patterns of  $\text{Co}_3\text{O}_4$  nanosheets on carbon paper after electrolysis in 0h and 9h.  $\text{Co}_3\text{O}_4$  maintains the original phase structure. No new phase is generated. **b)** Pourbaix diagram of cobalt <sup>6</sup>.

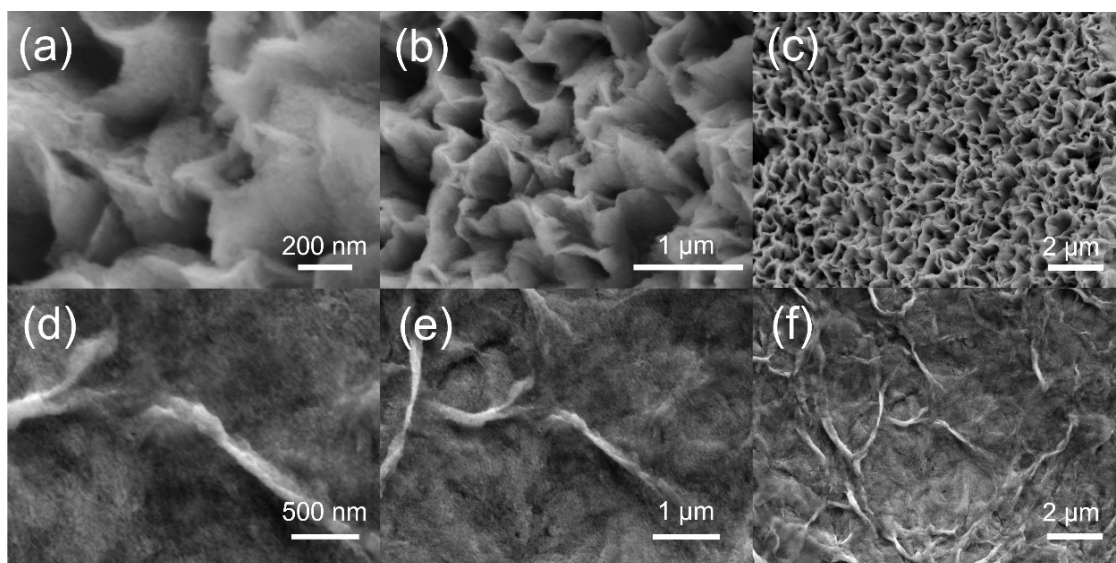

**Figure S7.** SEM image of  $\text{Co}_3\text{O}_4$  after acidic OER of 9h. **a-c)** Weakly dissolved region. **d-f)** Intensely dissolved region.

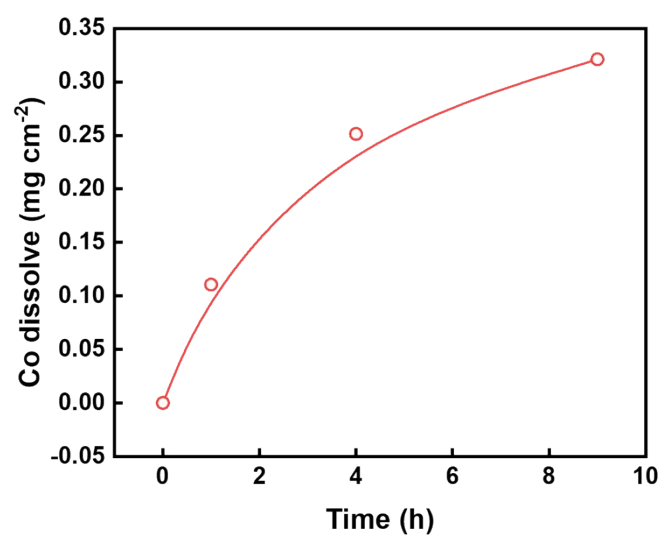

**Figure S8.** Mass of Co in the electrolyte (pH=0) at 0h, 1h, 4h, and 9h. The mass was measured by ICP-MS.

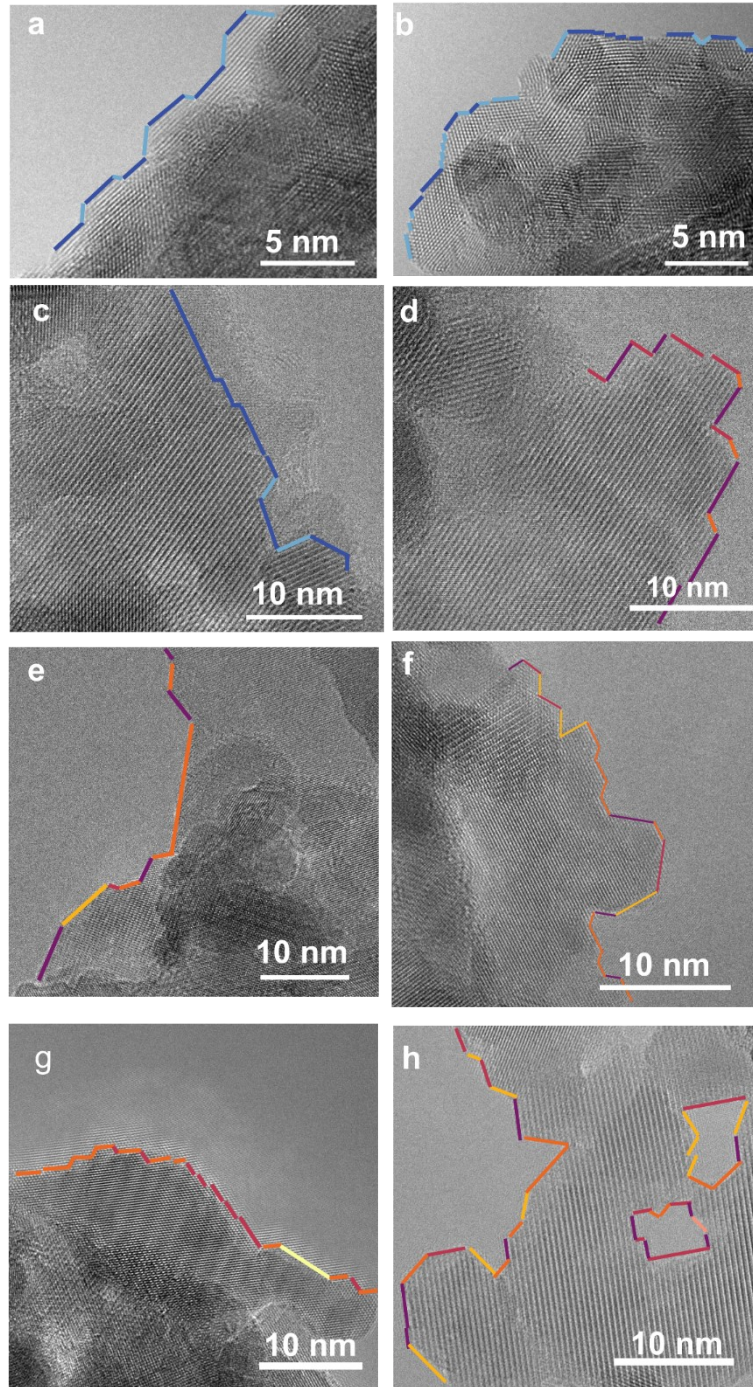

**Figure S9.** HRTEM images with labeled crystal facets of  $\text{Co}_3\text{O}_4$  nanosheets at different times. **a, b)** 0h. **c, d)** 1h. **e, f)** 4h. **g, h)** 9h.

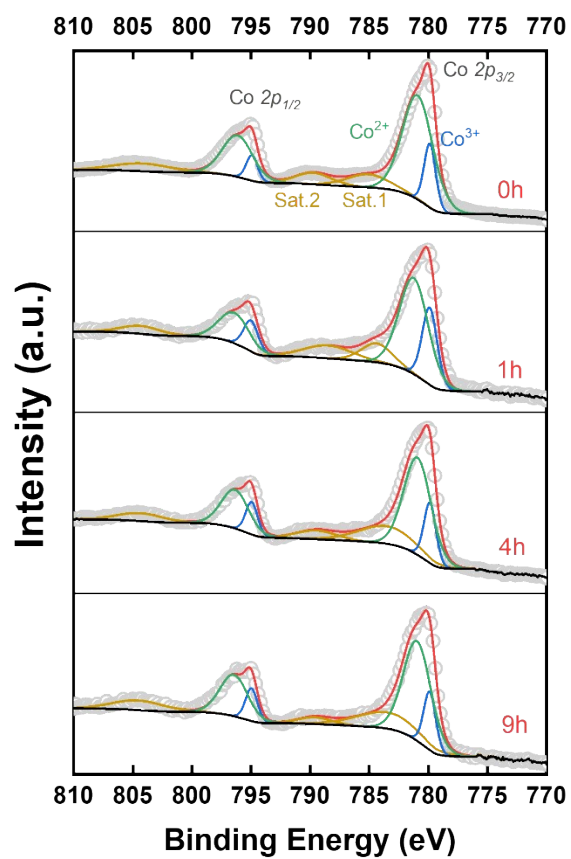

**Figure S10.** Co<sub>2p</sub> XPS spectra of Co<sub>3</sub>O<sub>4</sub> nanosheets after electrolysis for 1h, 4h and 9h. The fitting parameters are listed in Table S1.

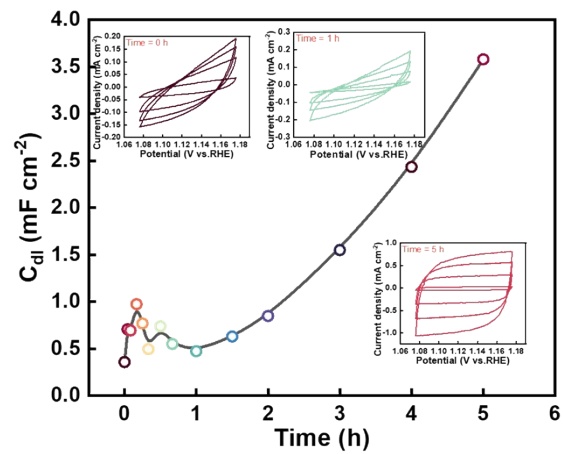

**Figure S11.** Evolution of electrochemical active surface area (ECSA) of  $\text{Co}_3\text{O}_4$  nanosheets during the deactivation in  $\text{pH}=0$  electrolyte. The insets show the ECSA curves at 0h, 1h, and 5h.



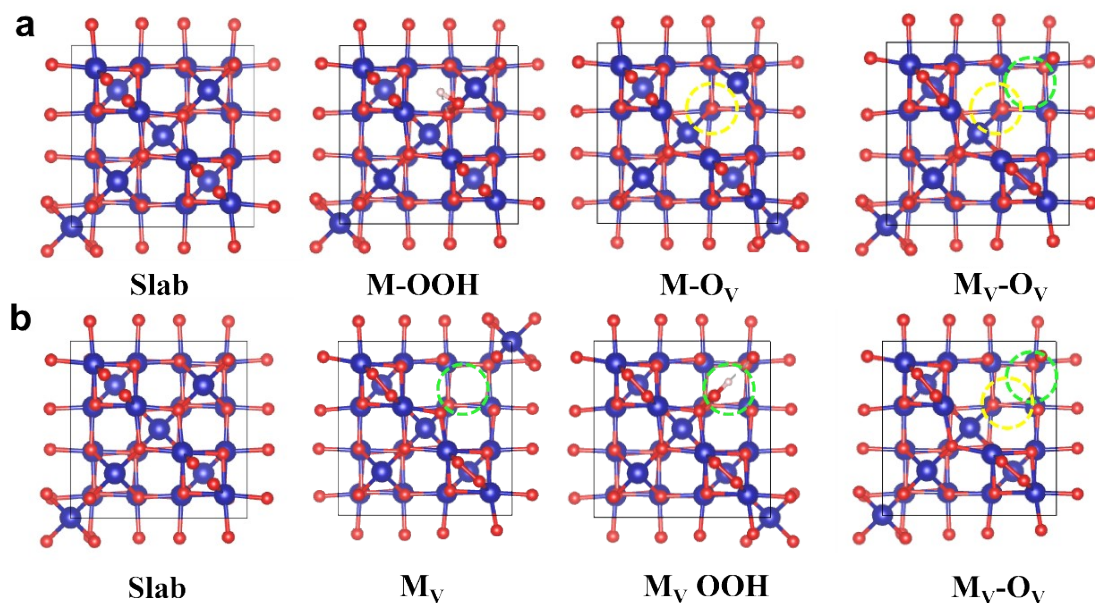

**Figure S12.** Top view of the model of  $\text{Co}_3\text{O}_4$  {100} crystal plane in the deactivation process. **a)** O-path. **b)** M-path of  $\text{Co}_3$ . The red sphere is an oxygen atom, the blue sphere is a cobalt atom, and the white sphere is a hydrogen atom. The yellow dashed circles correspond to oxygen vacancies and the green dashed circles correspond to metal vacancies.

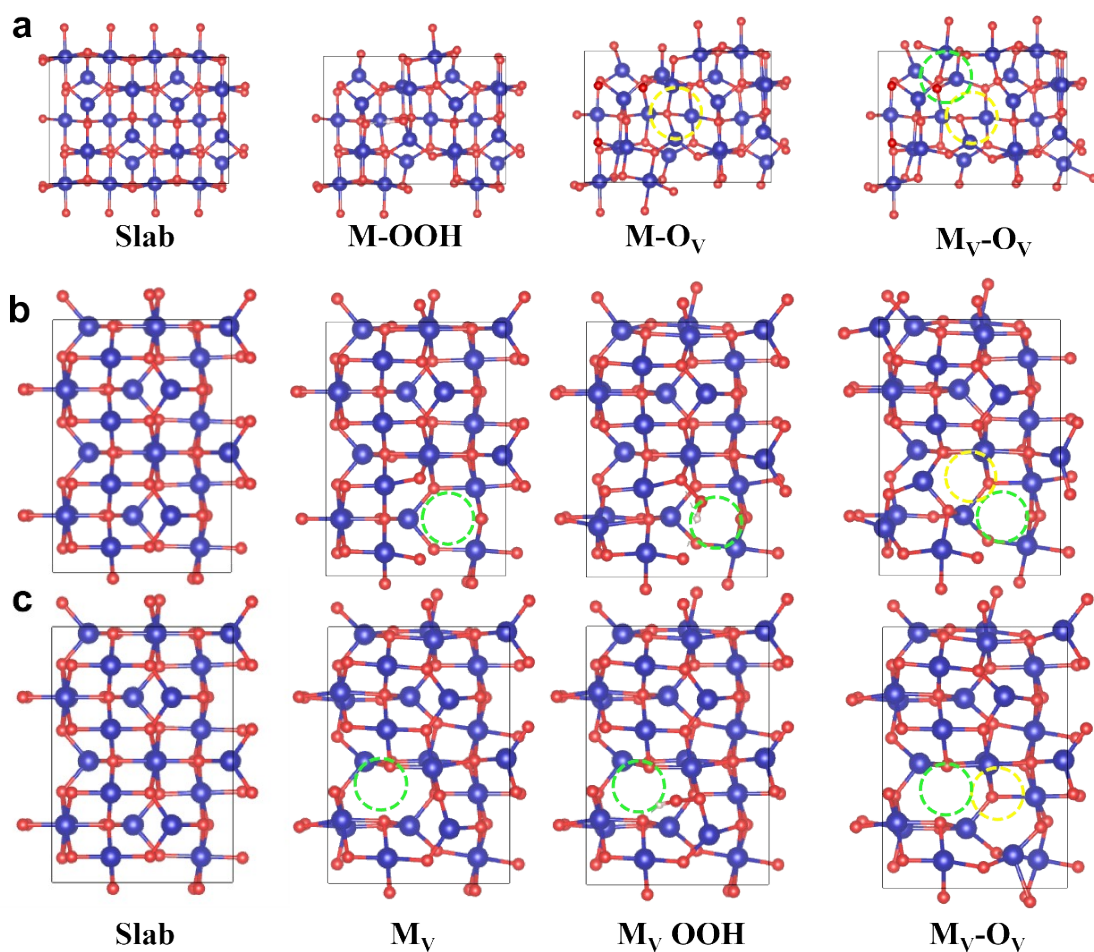

**Figure S13.** Top view of the model of  $\text{Co}_3\text{O}_4$  {110} crystal plane in the deactivation process. **a)** O-path. **b)** M-path of Co3. **c)** M-path of Co4. The red sphere is an oxygen atom, the blue sphere is a cobalt atom, and the white sphere is a hydrogen atom. The yellow dashed circles correspond to oxygen vacancies and the green corresponds to metal vacancies.

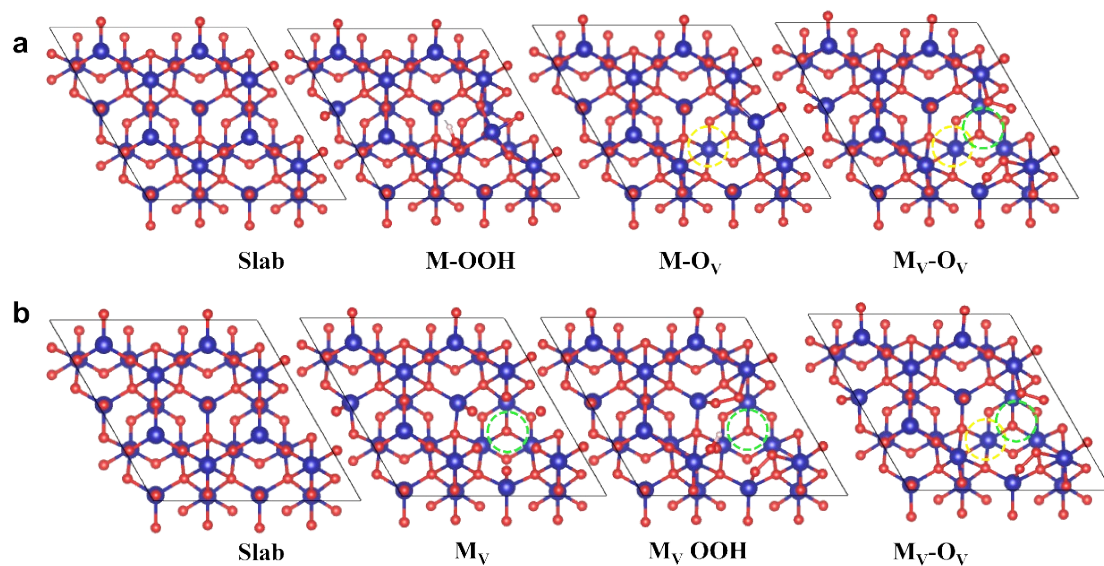

**Figure S14.** Top view of the model of  $\text{Co}_3\text{O}_4$  {111} crystal plane in the deactivation process. **a)** O-path. **b)** M-path of  $\text{Co}_4$ . The red sphere is an oxygen atom, the blue sphere is a cobalt atom, and the white sphere is a hydrogen atom. The yellow dashed circles correspond to oxygen vacancies and the green corresponds to metal vacancies.

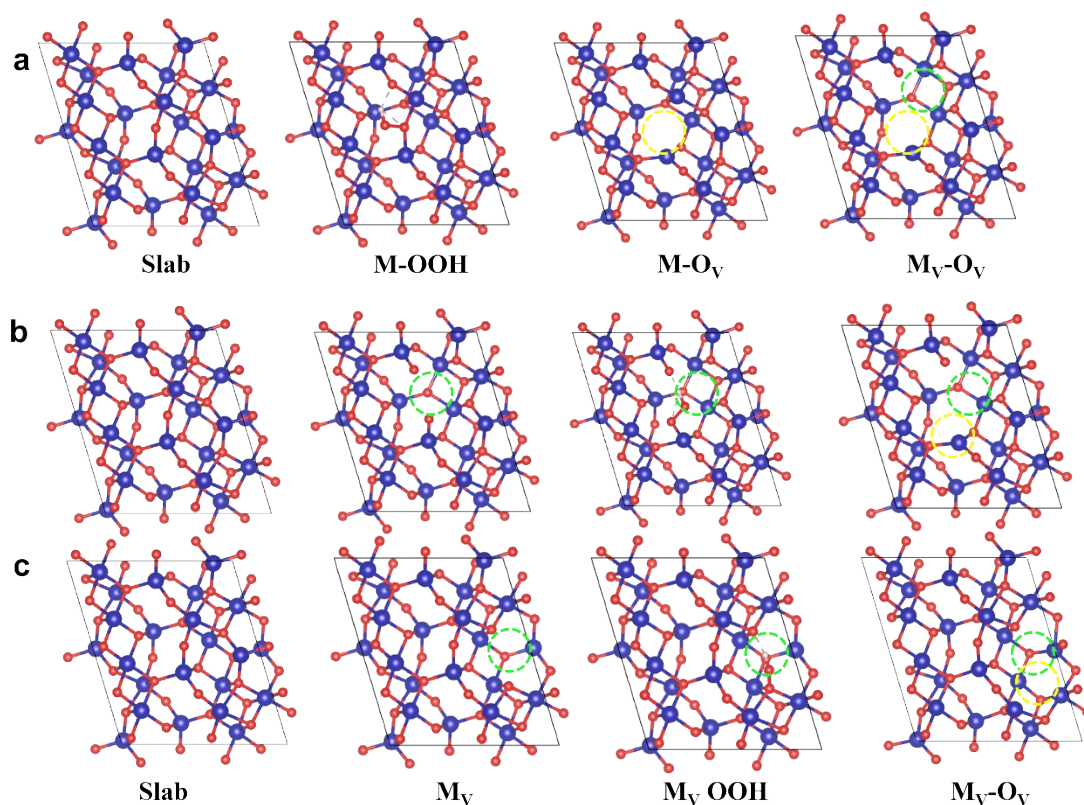

**Figure S15.** Top view of the model of  $\text{Co}_3\text{O}_4$  {311} crystal plane in the deactivation process. **a)** O-path. **b)** M-path of Co<sub>4</sub>. **c)** M-path of Co<sub>3</sub>. The red sphere is an oxygen atom, the blue sphere is a cobalt atom, and the white sphere is a hydrogen atom. The yellow dashed circles correspond to oxygen vacancies and the green corresponds to metal vacancies.

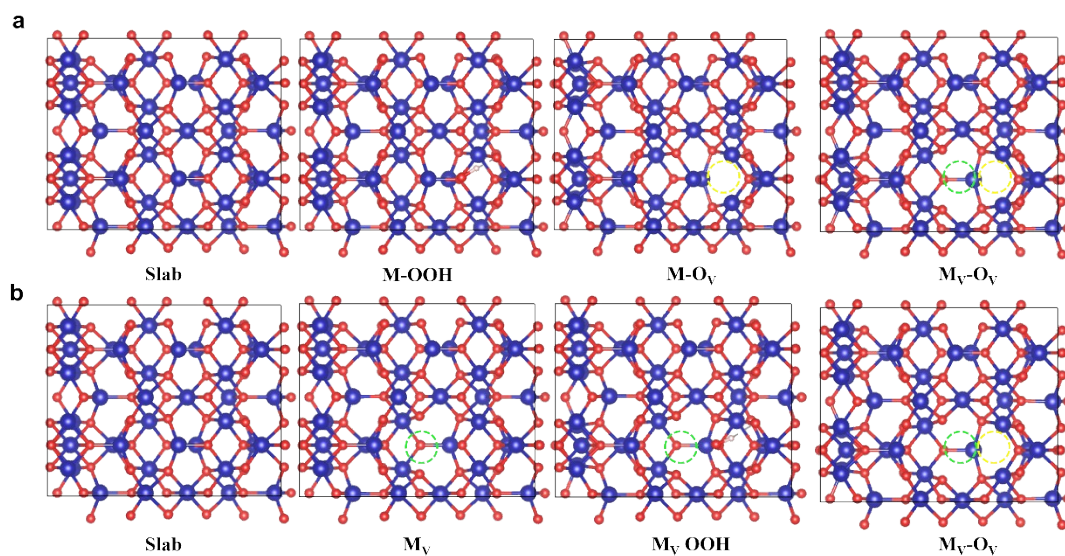

**Figure S16.** Top view of the model of  $\text{Co}_3\text{O}_4$  {211} crystal plane in the deactivation process. **a)** O-path. **b)** M-path of  $\text{Co}_3$ . The red sphere is an oxygen atom, the blue sphere is a cobalt atom, and the white sphere is a hydrogen atom. The yellow dashed circles correspond to oxygen vacancies and the green corresponds to metal vacancies.

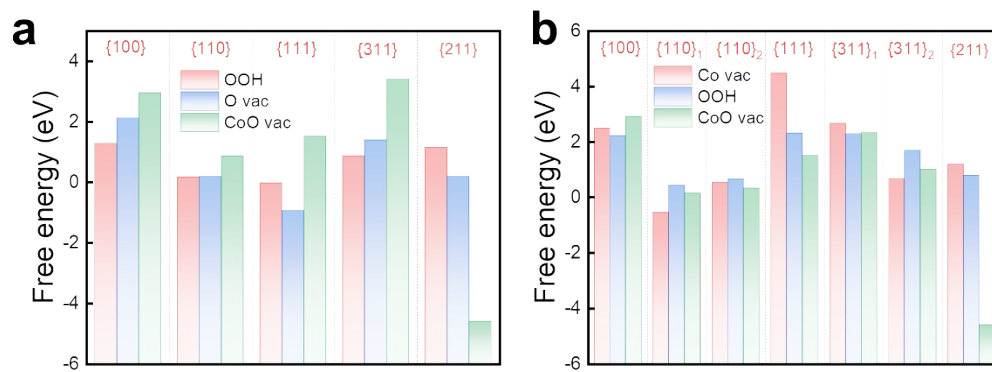

**Figure S17.** Free energies of elementary steps in dissolution reaction. **a)** O-path. **b)** M-path. See the reaction equations and energies of each path in Table S8-S9.

**Table S1.** Fitting parameters of the XPS of  $\text{Co}_3\text{O}_4$  at different times.

| Time | Integrated areas           |                  |                  | $\text{Co}^{3+}:\text{Co}^{2+}$ |        |
|------|----------------------------|------------------|------------------|---------------------------------|--------|
|      | <i>Co 2p<sub>3/2</sub></i> |                  |                  |                                 |        |
|      | $\text{Co}^{3+}$           | $\text{Co}^{3+}$ | $\text{Co}^{2+}$ |                                 |        |
| 0 h  | 35253.6                    | 0.23:1           | 14101.4          | 60538.8                         | 0.23:1 |
| 1 h  | 8947.9                     | 0.44:1           | 3579.2           | 7158.3                          | 0.44:1 |
| 4 h  | 9170.4                     | 0.30:1           | 4905.9           | 13330.1                         | 0.30:1 |
| 9 h  | 3795.2                     | 0.28:1           | 2119.0           | 6193.4                          | 0.28:1 |

**Table S2** Activity and stability of Cobalt-based catalysts for acidic OER in literature.

| Catalysis materials                              | Preparation methods            | Electrolytes                  | $\eta(\text{mV})@10 \text{ mA cm}^{-2}$ | Tafel slope ( $\text{mV dec}^{-1}$ ) | Stability-testing periods (h)                  | Ref       |
|--------------------------------------------------|--------------------------------|-------------------------------|-----------------------------------------|--------------------------------------|------------------------------------------------|-----------|
| $\text{Co}_3\text{O}_4$                          | Electrodeposition+ calcination | 0.5 M $\text{H}_2\text{SO}_4$ | 393                                     | 52                                   | 12@10 $\text{mA cm}^{-2}$                      | This work |
| $\text{Co}_3\text{O}_4$                          | Electron-beam evaporation      | 0.5 M $\text{H}_2\text{SO}_4$ | 570                                     | 80                                   | 12@10 $\text{mA cm}^{-2}$                      | 7         |
| $\text{Co}_3\text{O}_4@\text{C}/\text{GPO}$      | Calcination                    | 1 M $\text{H}_2\text{SO}_4$   | 360                                     | 143                                  | 40@10 $\text{mA cm}^{-2}$                      | 8         |
| $\text{Co}_3\text{O}_4/\text{CP}$                | Electrodeposition+ calcination | 0.5 M $\text{H}_2\text{SO}_4$ | 420                                     | 112                                  | 1.5@10 $\text{mA cm}^{-2}$                     | 9         |
| $\text{Co}_3\text{O}_4@\text{C}$                 | Electrodeposition+ calcination | 0.5 M $\text{H}_2\text{SO}_4$ | 370                                     | 82                                   | 90@10 $\text{mA cm}^{-2}$                      | 9         |
| $\text{Co}_3\text{O}_4/\text{CeO}_2/\text{CP}$   | Electrodeposition+ calcination | 0.5 M $\text{H}_2\text{SO}_4$ | 347                                     | 88.1                                 | 50@10 $\text{mA cm}^{-2}$                      | 3         |
| $\text{Co}_2\text{TiO}_4$                        | Coprecipitated+ calcination    | 0.5 M $\text{H}_2\text{SO}_4$ | 513                                     | 240                                  | 10 @1.79 V vs.RHE                              | 10        |
| Ag doped $\text{Co}_3\text{O}_4$                 | Hydrothermal+ calcination      | 0.5 M $\text{H}_2\text{SO}_4$ | 680                                     | 219                                  | 10@ 1.8 V vs.RHE                               | 11        |
| Ag doped $\text{Co}_3\text{O}_4$                 | Hydrothermal+ calcination      | 0.5 M $\text{H}_2\text{SO}_4$ | 470                                     | 92                                   | 2000 CV cycles between 1.66 and 1.76 V vs. RHE | 12        |
| Ba[Co-POM]                                       | Metathesis                     | 1 M $\text{H}_2\text{SO}_4$   | 360                                     | 97                                   | 24@ $\eta=250 \text{ mV}$                      | 13        |
| Mn-doped $\text{FeP}/\text{Co}_3(\text{PO}_4)_2$ | Hydrothermal+ Phosphorization  | 0.5 M $\text{H}_2\text{SO}_4$ | 460                                     | 472                                  | >30 000 s@10 $\text{mA cm}^{-2}$               | 14        |
| $\text{NiCo}_2\text{O}_4$                        | Electrodeposition+ calcination | 0.5 M $\text{H}_2\text{SO}_4$ | 610                                     | 144                                  | 10@10 $\text{mA cm}^{-2}$                      | 15        |



**Table S3.** Fitting parameters of the reduction peaks of  $\text{Co}_3\text{O}_4$  at different times

(pH=0).

| Time<br>(h) | Peak C1          |             |          | Peak C2          |             |          | Peak C3          |             |          |
|-------------|------------------|-------------|----------|------------------|-------------|----------|------------------|-------------|----------|
|             | xc<br>(V vs.RHE) | A<br>(V mA) | w<br>(V) | xc<br>(V vs.RHE) | A<br>(V mA) | w<br>(V) | xc<br>(V vs.RHE) | A<br>(V mA) | w<br>(V) |
| 0           | 1.455            | 0.025       | 0.129    | 1.568            | 0.003       | 0.021    | 1.580            | 0.005       | 0.015    |
| 0.5         | 1.468            | 0.004       | 0.089    | 1.542            | 0.005       | 0.030    | 1.575            | 0.016       | 0.030    |
| 1           | 1.468            | 0.005       | 0.103    | 1.547            | 0.008       | 0.030    | 1.579            | 0.022       | 0.030    |
| 2           |                  |             |          | 1.550            | 0.012       | 0.032    | 1.583            | 0.027       | 0.032    |
| 3           |                  |             |          | 1.554            | 0.018       | 0.032    | 1.587            | 0.033       | 0.032    |
| 4           |                  |             |          | 1.553            | 0.021       | 0.034    | 1.586            | 0.032       | 0.032    |
| 5           |                  |             |          | 1.553            | 0.021       | 0.034    | 1.586            | 0.032       | 0.032    |
| 6           |                  |             |          | 1.549            | 0.024       | 0.050    | 1.584            | 0.033       | 0.040    |
| 7           |                  |             |          | 1.522            | 0.017       | 0.060    | 1.575            | 0.043       | 0.050    |
| 8           |                  |             |          | 1.485            | 0.018       | 0.080    | 1.568            | 0.046       | 0.060    |
| 9           |                  |             |          | 1.468            | 0.017       | 0.100    | 1.559            | 0.042       | 0.080    |
| 10          |                  |             |          | 1.457            | 0.012       | 0.100    | 1.552            | 0.029       | 0.080    |
| 11          |                  |             |          | 1.470            | 0.005       | 0.100    | 1.544            | 0.013       | 0.080    |

'xc', 'A' and 'w' refers to the peak position area and width of a typical

Gaussian peak.

**Table S4.** Fitting parameters of the reduction peaks of  $\text{Co}_3\text{O}_4$  at different times (pH=1.4).

| Time<br>(h) | Peak C1          |             |          | Peak C2          |             |          | Peak C3          |             |          |
|-------------|------------------|-------------|----------|------------------|-------------|----------|------------------|-------------|----------|
|             | xc<br>(V vs.RHE) | A<br>(V mA) | w<br>(V) | xc<br>(V vs.RHE) | A<br>(V mA) | w<br>(V) | xc<br>(V vs.RHE) | A<br>(V mA) | w<br>(V) |
| 0           | 1.407            | 0.011       | 0.125    | 1.529            | 0.015       | 0.036    | 1.553            | 0.017       | 0.022    |
| 0.5         | 1.429            | 0.009       | 0.105    | 1.509            | 0.008       | 0.030    | 1.538            | 0.012       | 0.030    |
| 1           | 1.412            | 0.008       | 0.110    | 1.504            | 0.007       | 0.030    | 1.538            | 0.015       | 0.030    |
| 2           | 1.410            | 0.010       | 0.137    | 1.512            | 0.010       | 0.030    | 1.543            | 0.016       | 0.030    |
| 3           |                  |             |          | 1.511            | 0.012       | 0.032    | 1.545            | 0.019       | 0.032    |
| 4           |                  |             |          | 1.511            | 0.016       | 0.034    | 1.546            | 0.021       | 0.032    |
| 5           |                  |             |          | 1.509            | 0.018       | 0.034    | 1.544            | 0.022       | 0.032    |
| 6           |                  |             |          | 1.508            | 0.020       | 0.036    | 1.544            | 0.022       | 0.034    |
| 7           |                  |             |          | 1.504            | 0.021       | 0.038    | 1.543            | 0.024       | 0.036    |
| 8           |                  |             |          | 1.503            | 0.021       | 0.040    | 1.543            | 0.022       | 0.038    |
| 9           |                  |             |          | 1.500            | 0.020       | 0.040    | 1.541            | 0.021       | 0.038    |
| 10          |                  |             |          | 1.496            | 0.020       | 0.045    | 1.540            | 0.019       | 0.040    |
| 11          |                  |             |          | 1.487            | 0.016       | 0.050    | 1.536            | 0.018       | 0.045    |
| 12          |                  |             |          | 1.479            | 0.010       | 0.050    | 1.530            | 0.013       | 0.045    |

'xc', 'A' and 'w' refers to the peak position area and width of a typical

Gaussian peak.

**Table S5.** Fitting parameters of the reduction peaks of  $\text{Co}_3\text{O}_4$  at different times (pH=2.8).

| Time<br>(h) | Peak C1          |             |          | Peak C2          |             |          | Peak C3          |             |          |
|-------------|------------------|-------------|----------|------------------|-------------|----------|------------------|-------------|----------|
|             | xc<br>(V vs.RHE) | A<br>(V mA) | w<br>(V) | xc<br>(V vs.RHE) | A<br>(V mA) | w<br>(V) | xc<br>(V vs.RHE) | A<br>(V mA) | w<br>(V) |
| 0           | 1.380            | 0.014       | 0.125    | 1.477            | 0.010       | 0.036    | 1.509            | 0.011       | 0.022    |
| 0.5         | 1.381            | 0.015       | 0.105    | 1.457            | 0.010       | 0.030    | 1.497            | 0.017       | 0.030    |
| 1           | 1.381            | 0.007       | 0.110    | 1.452            | 0.008       | 0.030    | 1.492            | 0.014       | 0.030    |
| 2           | 1.391            | 0.007       | 0.137    | 1.454            | 0.009       | 0.030    | 1.492            | 0.015       | 0.030    |
| 3           | 1.403            | 0.009       |          | 1.460            | 0.011       | 0.032    | 1.496            | 0.016       | 0.032    |
| 4           | 1.402            | 0.007       |          | 1.459            | 0.012       | 0.034    | 1.497            | 0.017       | 0.032    |
| 5           | 1.402            | 0.008       |          | 1.461            | 0.013       | 0.034    | 1.498            | 0.019       | 0.032    |
| 6           | 1.402            | 0.005       |          | 1.461            | 0.015       | 0.036    | 1.499            | 0.019       | 0.034    |
| 7           | 1.402            | 0.006       |          | 1.462            | 0.016       | 0.038    | 1.500            | 0.019       | 0.036    |
| 8           | 1.402            | 0.006       |          | 1.462            | 0.017       | 0.040    | 1.501            | 0.021       | 0.038    |
| 9           | 1.402            | 0.006       |          | 1.464            | 0.017       | 0.040    | 1.503            | 0.021       | 0.038    |
| 10          | 1.402            | 0.005       |          | 1.462            | 0.018       | 0.045    | 1.501            | 0.021       | 0.040    |
| 11          |                  |             |          | 1.448            | 0.017       | 0.050    | 1.495            | 0.028       | 0.045    |
| 12          |                  |             |          | 1.450            | 0.018       | 0.050    | 1.495            | 0.027       | 0.045    |

'xc', 'A' and 'w' refers to the peak position area and width of a typical Gaussian peak.

**Table S6.** EIS fitting parameters of Co<sub>3</sub>O<sub>4</sub>.

| Time | R $\Omega$ | Cdl                 | Rp     | C $\Phi$            | Rs    | Rfilm  | Cfilm               |
|------|------------|---------------------|--------|---------------------|-------|--------|---------------------|
| h    | ohm        | mF cm <sup>-2</sup> | ohm    | mF cm <sup>-2</sup> | ohm   | ohm    | mF cm <sup>-2</sup> |
| 0    | 1.462      | 0.0041              | 0.0213 | 0.184               | 51.24 | 0.0300 | 0.1144              |
| 1    | 1.499      | 0.0037              | 0.0594 | 0.1792              | 94.11 | 0.1329 | 0.4926              |
| 4    | 1.583      | 0.0018              | 0.3066 | 0.1601              | 1736  | 0.8089 | 0.3138              |
| 5    | 1.619      | 0.0029              | 0.5533 | 0.1414              | 2266  | 1.357  | 0.2                 |
| 9    | 1.66       | 0.0078              | 0.593  | 0.06258             | 2911  | 5.842  | 0.05497             |

**Table S7.** The reaction formula of the two dissolving paths of  $\text{Co}_3\text{O}_4$  used for energy calculation.

|        |                                                                                                                                                                                |
|--------|--------------------------------------------------------------------------------------------------------------------------------------------------------------------------------|
| O-path |                                                                                                                                                                                |
| Step1  | $*+ \text{H}_2\text{O} + 0e^- \rightarrow * \text{Ovac} - \text{OOH} + 0.5\text{H}_2 + e^-$                                                                                    |
| Step2  | $* \text{Ovac} - \text{OOH} + 0.5\text{H}_2 + e^- \rightarrow * \text{Ovac} + \text{H}_2 + \text{O}_2 + 2e^-$                                                                  |
| Step3  | $* \text{Ovac} + \text{H}_2 + \text{O}_2 + 2e^- \rightarrow * \text{Ovac} - \text{Covac} + \text{Co}^{2+} + \text{H}_2 + \text{O}_2 + 4e^-$                                    |
| M-path |                                                                                                                                                                                |
| Step1  | $*+ \text{H}_2\text{O} + 0e^- \rightarrow * \text{Covac} + \text{Co}^{2+} + \text{H}_2\text{O} + 2e^-$                                                                         |
| Step2  | $* \text{Covac} + \text{Co}^{2+} + \text{H}_2\text{O} + 2e^- \rightarrow * \text{Covac} - \text{Ovac} - \text{OOH} + \text{Co}^{2+} + 0.5\text{H}_2 + 3e^-$                    |
| Step3  | $* \text{Covac} - \text{Ovac} - \text{OOH} + \text{Co}^{2+} + 0.5\text{H}_2 + 2e^- \rightarrow * \text{Covac} - \text{Ovac} + \text{Co}^{2+} + \text{H}_2 + \text{O}_2 + 4e^-$ |

**Table S8.** Free energy (eV) of intermediates on different crystal planes of  $\text{Co}_3\text{O}_4$  following O-path.

|       | slab | OOH      | O vac    | CoO vac  |
|-------|------|----------|----------|----------|
| {100} | 0    | 1.29194  | 2.12773  | 2.96253  |
| {110} | 0    | 0.17401  | 0.18953  | 0.86872  |
| {111} | 0    | -0.01761 | -0.92366 | 1.52066  |
| {311} | 0    | 0.86743  | 1.40186  | 3.42149  |
| {211} | 0    | 1.15898  | 0.19164  | -4.58905 |

**Table S9.** Free energy (eV) of intermediates on different crystal planes of  $\text{Co}_3\text{O}_4$  following M-path.

|       | slab | Co vac   | OOH     | CoO vac  |
|-------|------|----------|---------|----------|
| {100} | 0    | 2.49692  | 2.22673 | 2.9201   |
| {110} | 0    | -0.52461 | 0.44406 | 0.16442  |
| {110} | 0    | 0.54807  | 0.67216 | 0.3408   |
| {111} | 0    | 4.49283  | 2.31996 | 1.52066  |
| {311} | 0    | 2.67612  | 2.29769 | 2.34123  |
| {311} | 0    | 0.68508  | 1.70088 | 1.01558  |
| {211} | 0    | 1.20229  | 0.79418 | -4.58905 |

## Reference

- 1 L. G. Bloor, P. I. Molina, M. D. Symes and L. Cronin, Low pH Electrolytic Water Splitting Using Earth-Abundant Metastable Catalysts That Self-Assemble in Situ, *J. Am. Chem. Soc.*, 2014, **136**, 3304–3311.
- 2 X.-H. Xia, J.-P. Tu, X.-L. Wang, C.-D. Gu and X.-B. Zhao, Mesoporous Co<sub>3</sub>O<sub>4</sub> monolayer hollow-sphere array as electrochemical pseudocapacitor material, *Chem. Commun.*, 2011, **47**, 5786–5788.
- 3 J. Huang, H. Sheng, R. D. Ross, J. Han, X. Wang, B. Song and S. Jin, Modifying redox properties and local bonding of Co<sub>3</sub>O<sub>4</sub> by CeO<sub>2</sub> enhances oxygen evolution catalysis in acid, *Nat. Commun.*, 2021, **12**, 3036.
- 4 R. L. Doyle, I. J. Godwin, M. P. Brandon and M. E. G. Lyons, Redox and electrochemical water splitting catalytic properties of hydrated metal oxide modified electrodes, *Phys Chem Chem Phys*, 2013, **15**, 13737–13783.
- 5 M. E. G. Lyons and M. P. Brandon, The significance of electrochemical impedance spectra recorded during active oxygen evolution for oxide covered Ni, Co and Fe electrodes in alkaline solution, *J. Electroanal. Chem.*, 2009, **631**, 62–70.
- 6 E. M. Garcia, J. S. Santos, E. C. Pereira and M. B. J. G. Freitas, Electrodeposition of cobalt from spent Li-ion battery cathodes by the electrochemistry quartz crystal microbalance technique, *J. Power Sources*, 2008, **185**, 549–553.
- 7 J. S. Mondschein, J. F. Callejas, C. G. Read, J. Y. C. Chen, C. F. Holder, C. K. Badding and R. E. Schaak, Crystalline Cobalt Oxide Films for Sustained Electrocatalytic Oxygen Evolution under Strongly Acidic Conditions, *Chem. Mater.*, 2017, **29**, 950–957.
- 8 J. Yu, F. A. Garcés-Pineda, J. González-Cobos, M. Peña-Díaz, C. Rogero, S. Giménez, M. C. Spadaro, J. Arbiol, S. Barja and J. R. Galán-Mascarós, Sustainable oxygen evolution electrocatalysis in aqueous 1 M H<sub>2</sub>SO<sub>4</sub> with earth abundant nanostructured Co<sub>3</sub>O<sub>4</sub>, *Nat. Commun.*, 2022, **13**, 4341.
- 9 Xiulin Yang, Henan Li, Ang-Yu Lu, Shixiong Min, Zacharie Idriss, Zacharie Idriss, Mohamed N. Hedhili, Kuo-Wei Huang, Hicham Idriss, and Lain-Jong Li, Highly acid-durable carbon coated Co<sub>3</sub>O<sub>4</sub> nanoarrays as efficient oxygen evolution electrocatalysts, *Nano Energy*, 2016, **25**, 42–50.
- 10 S. Anantharaj, K. Karthick and S. Kundu, Spinel Cobalt Titanium Binary Oxide as an All-Non-Precious Water Oxidation Electrocatalyst in Acid, *Inorg. Chem.*, 2019, **58**, 8570–8576.
- 11 Kai-Li Yan, Jing-Qi Chi, Jing-Yi Xie, Bin Dong, Zi-Zhang Liu, Wen-Kun Gao, Jia-Hui Lin, Yong-Ming Chai, and Chenguang Liu, Mesoporous Ag-doped Co<sub>3</sub>O<sub>4</sub> nanowire arrays supported on FTO as efficient electrocatalysts for oxygen evolution reaction in acidic media, *Renew. Energy*, 2018, **119**, 54–61.
- 12 Kai-Li Yan, Jun-Feng Qin, Jia-Hui Lin, Bin Dong, Jing-Qi Chi, Zi-Zhang Liu, Fangna Dai, Yong-Ming Chai, and Chenguang Liu, Probing the active sites of Co<sub>3</sub>O<sub>4</sub> for the acidic oxygen evolution reaction by modulating the



- Co<sup>2+</sup>/Co<sup>3+</sup> ratio, *J. Mater. Chem.*, 2018, **6**, 5678–5686.
- 13 M. Blasco-Ahicart, J. Soriano-Lopez, J. J. Carbo, J. M. Poblet and J. R. Galan-Mascaros, Polyoxometalate electrocatalysts based on earth-abundant metals for efficient water oxidation in acidic media, *Nat. Chem.*, 2018, **10**, 24–30.
  - 14 H. Liu, X. Peng, X. Liu, G. Qi and J. Luo, Porous Mn-Doped FeP/Co<sub>3</sub>(PO<sub>4</sub>)<sub>2</sub> Nanosheets as Efficient Electrocatalysts for Overall Water Splitting in a Wide pH Range, *ChemSusChem*, 2019, **12**, 1334–1341.
  - 15 J. Yin, J. Jin, M. Lu, B. Huang, H. Zhang, Y. Peng, P. Xi and C.-H. Yan, Iridium Single Atoms Coupling with Oxygen Vacancies Boosts Oxygen Evolution Reaction in Acid Media, *J. Am. Chem. Soc.*, 2020, **142**, 18378–18386.
